# Supplementary material for: Measuring Research Engagement among Previously Incarcerated Persons and Other Carceral Stakeholders while Implementing Wastewater-based Surveillance for SARS-CoV-2 in Jails: A Mixed-Methods Study
Source: Research Square preprint supplement (doi:10.21203/rs.3.rs-7456979/v1), 2025-10-14
Supplement: Supplementary file 1 [file 4231e6a4965b70ec4de82b28.docx]

Appendix 1: Implementation Team Roles

| Predetermined Implementation Team Roles Suggested by Study Design | Examples of Eligible Positions |
| --- | --- |
| Lead Administrator of Jail | Sheriff, Chief Jailer |
| Medical Director or Health Authority | Lead doctor, clinically trained medical vendor leader |
| Director of Nursing | Lead RN for jail/medical vendor |
| Health Services Administrator | Person overseeing management of healthcare |
| Director of Facilities Management | Person overseeing plumbing; hire of jail /vendor |
| Mid-level Custody Manager | Capt./lieutenant, oversees correctional officers |
| Non-managerial Staff (2) | Correctional officer; Nurse; Administration employee |
| Former jailed persons (2) | Persons with lived experience (PLE) of residing in a jail |

Appendix 2: (Consolidated criteria for Reporting Qualitative research (CORE-Q) Checklist

| **Topic** | **Item No.** | **Guide Questions/Description** | **Reported on**  **Page No.** |
| --- | --- | --- | --- |
| **Domain 1: Research team**  **and reflexivity** | | | |
| *Personal characteristics* | | | |
| Interviewer/facilitator | 1 | Which author/s conducted the interview or focus group? | 7 |
| Credentials | 2 | What were the researcher’s credentials? E.g. PhD, MD | 7 |
| Occupation | 3 | What was their occupation at the time of the study? | 7 |
| Gender | 4 | Was the researcher male or female? | 7 |
| Experience and training | 5 | What experience or training did the researcher have? | 7 |
| *Relationship with*  *participants* | | | |
| Relationship established | 6 | Was a relationship established prior to study commencement? | 5-7 |
| Participant knowledge of  the interviewer | 7 | What did the participants know about the researcher? e.g. personal  goals, reasons for doing the research |  |
| 7 |
|  |
| Interviewer characteristics | 8 | What characteristics were reported about the inter viewer/facilitator?  e.g. Bias, assumptions, reasons and interests in the research topic |  |
| 6-7 |
|  |
| **Domain 2: Study design** | | | |
| *Theoretical framework* | | | |
| Methodological orientation and Theory | 9 | What methodological orientation was stated to underpin the study? e.g. grounded theory, discourse analysis, ethnography, phenomenology,  content analysis |  |
| 8 |
|  |
| *Participant selection* | | | |
| Sampling | 10 | How were participants selected? e.g. purposive, convenience,  consecutive, snowball |  |
| 5 |
|  |
| Method of approach | 11 | How were participants approached? e.g. face-to-face, telephone, mail,  email |  |
| 5 |
|  |
| Sample size | 12 | How many participants were in the study? | 6 |
| Non-participation | 13 | How many people refused to participate or dropped out? Reasons? | 5 |
| *Setting* | | | |
| Setting of data collection | 14 | Where was the data collected? e.g. home, clinic, workplace | 7 |
| Presence of non-  participants | 15 | Was anyone else present besides the participants and researchers? |  |
| 7 |
|  |
| Description of sample | 16 | What are the important characteristics of the sample? e.g. demographic  data, date |  |
| 6 |
|  |
| *Data collection* | | | |
| Interview guide | 17 | Were questions, prompts, guides provided by the authors? Was it pilot  tested? | 7 |
|  |
| Repeat interviews | 18 | Were repeat inter views carried out? If yes, how many? | N/A |
| Audio/visual recording | 19 | Did the research use audio or visual recording to collect the data? | 7 |
| Field notes | 20 | Were field notes made during and/or after the inter view or focus group? | 7 |
| Duration | 21 | What was the duration of the inter views or focus group? | 7 |
| Data saturation | 22 | Was data saturation discussed? | 8 |
| Transcripts returned | 23 | Were transcripts returned to participants for comment and/or | 7 |

| **Topic** | **Item No.** | **Guide Questions/Description** | **Reported on**  **Page No.** |
| --- | --- | --- | --- |
|  |  | correction? |  |
| **Domain 3: analysis and**  **findings** | | | |
| *Data analysis* | | | |
| Number of data coders | 24 | How many data coders coded the data? | 8 |
| Description of the coding  tree | 25 | Did authors provide a description of the coding tree? |  |
| N/A |
|  |
| Derivation of themes | 26 | Were themes identified in advance or derived from the data? | 8 |
| Software | 27 | What software, if applicable, was used to manage the data? | N/A |
| Participant checking | 28 | Did participants provide feedback on the findings? | 7 |
| *Reporting* | | | |
| Quotations presented | 29 | Were participant quotations presented to illustrate the themes/findings?  Was each quotation identified? e.g. participant number |  |
| 10-15 |
|  |
| Data and findings consistent | 30 | Was there consistency between the data presented and the findings? | 20 |
| Clarity of major themes | 31 | Were major themes clearly presented in the findings? | 10-15 |
| Clarity of minor themes | 32 | Is there a description of diverse cases or discussion of minor themes? | 12-13 |

Developed from: Tong A, Sainsbury P, Craig J. Consolidated criteria for reporting qualitative research (COREQ): a 32-item checklist for interviews and focus groups. *International Journal for Quality in Health Care*. 2007. Volume 19, Number 6: pp. 349 – 357

Appendix 3. Items of the Research Engagement Survey Tool

| **Research Engagement Survey Tool**  **EP=Engagement Principle; Bold Text represents the EP titles* | |
| --- | --- |
| **EP1. Focus on community perspectives and determinants of health** | The focus is on problems important to the community. |
| All partners look at the data to determine the health problems the community thinks are important. |
| The effort incorporates factors (for example—housing, transportation, food access, education, employment) that influence health status. |
| The focus is on cultural factors that influence health behaviors. |
| **EP2. Partner input is vital** | All partners have the opportunity to share ideas, input, and leadership responsibilities and to share in the determination of the project structure. |
| Plans are developed and adjusted to meet the needs and concerns of the community or patient population. |
| All partners agree to take on specific tasks according to their comfort, ability, and expertise. |
| All partners assist in establishing roles and related responsibilities for the partnership. |
| **EP3. Partnership sustainability to meet goals and objectives** | All partners share updates, progress, strategies, and new ideas regularly. |
| A plan is in place for ongoing problem-solving. |
| All partners are involved in determining next steps. |
| Community-engaged activities are continued until the goals (as agreed upon by all partners) are achieved. |
| All partners continue community-engaged activities beyond an initial project, activity, or study. |
| **EP4. Foster co-learning, capacity building, and co-benefit for all partners** | All partners have a variety of opportunities to gain new skills or knowledge from their involvement. |
| All partners are encouraged to learn from each other. |
| The partnership adds value to the work of all partners. |
| All partners share resources to increase ability to address the problem of interest. |
| **EP5. Build on strengths and resources within the community or patient population** | The team builds on strengths and resources within the community or patient population. |
| The team works with existing community groups and organizations. |
| The team includes representation from the local community or patient population. |
| **EP6. Facilitate collaborative, equitable partnerships** | Fair processes have been established to manage conflict or disagreements. |
| All partners’ ideas are treated with openness and respect. |
| All partners agree on the timeline for making shared decisions about the project. |
| All partners agree on ownership of data for publications and presentations. |
| ***EP7. Involve all partners in the dissemination process**  *Note: This Engagement Principle was not measured in this study | All partners can use knowledge generated from the partnership. |
| All interested partners are involved in activities related to sharing results. |
| All partners have the opportunity to be coauthors when the work is published. |
| **EP8. Build and maintain trust in the partnership** | The partnership’s processes support trust among all partners. |
| All partners are confident that they will receive credit for their contributions to the partnership. |
| Mutual respect exists among all partners. |
| All partners respect the population being served. |
| All partners understand the culture of the organizations and community(ies) involved in the partnership. |

Appendix 4.

Mean Results of the Research Engagement Survey Tool for All Implementation 95% CI

| Mean Results of the Research Engagement Survey Tool for All Implementation Team Members,  n=19 | | | | | | | | | | | | | | | | | | |
| --- | --- | --- | --- | --- | --- | --- | --- | --- | --- | --- | --- | --- | --- | --- | --- | --- | --- | --- |
|  | Quality: How Well EPs were Accomplished | | | | | | | | | Quantity: How Often Eps were Accomplished | | | | | | | | |
| EP | All (n=19) | Lower CI | Upper CI | CS (n=12) | Lower CI | Upper CI | PLE (n=7) | Lower CI | Upper CI | All (n=19) | Lower CI | Upper CI | CS (n=12) | Lower CI | Upper CI | PLE (n=7) | Lower CI | Upper CI |
| 1 | 3.8 | 3.4 | 4.2 | 4.0 | 3.7 | 4.4 | 3.5 | 2.5 | 4.5 | 3.9 | 3.6 | 4.3 | 4.2 | 4.0 | 4.4 | 3.5 | 2.6 | 4.4 |
| 2 | 3.6 | 3.2 | 4.1 | 3.8 | 3.3 | 4.4 | 3.3 | 2.3 | 4.2 | 4.0 | 3.6 | 4.3 | 4.1 | 3.8 | 4.4 | 3.8 | 2.8 | 4.7 |
| 3 | 3.4 | 2.9 | 3.8 | 3.5 | 3.0 | 4.1 | 3.0 | 1.0 | 4.2 | 3.5 | 3.1 | 4.0 | 3.7 | 3.3 | 4.1 | 3.3 | 2.0 | 4.5 |
| 4 | 3.7 | 3.2 | 4.2 | 3.9 | 3.3 | 4.5 | 3.3 | 2.4 | 4.3 | 3.8 | 3.3 | 4.3 | 4.0 | 3.6 | 4.5 | 3.3 | 2.1 | 4.5 |
| 5 | 3.4 | 3.0 | 3.9 | 3.7 | 3.1 | 4.2 | 3.1 | 2.2 | 3.9 | 3.5 | 3.0 | 4.0 | 3.8 | 3.3 | 4.3 | 3.0 | 2.0 | 4.0 |
| 6 | 3.5 | 3.0 | 4.1 | 3.9 | 3.3 | 4.5 | 3.0 | 2.0 | 4.1 | 3.6 | 3.1 | 4.2 | 4.2 | 3.8 | 4.5 | 3.0 | 2.0 | 4.0 |
| 8 | 3.9 | 3.4 | 4.4 | 4.4 | 4.0 | 4.7 | 3.0 | 2.0 | 4.0 | 4.0 | 3.5 | 4.5 | 4.5 | 4.2 | 4.8 | 3.1 | 2.1 | 4.0 |
| *Carceral Stakeholder (CS)*  *95% Confidence Intervals (CI)* | | | | | | | | | | | | | | | | | | |
